# Supplementary material for: Targeting oxidative pentose phosphate pathway prevents recurrence in mutant Kras colorectal carcinomas
Source: PLoS Biol. 2019 Aug 28;17(8):e3000425. doi: 10.1371/journal.pbio.3000425 (PMC6736310; doi:10.1371/journal.pbio.3000425)
Supplement: S1 Data — (XLSX) [file pbio.3000425.s009.xlsx]

## Sheet: Fig 1A
Fig 1A. Differential survival of CDCP1+ subpopulation in CRCs harboring wtKras and muKras after treatment with 5-FU.
DKs5
	0h			48h			72h
CDCP1+7AAD-	15.98	18.01	17.27	17.88	17.21	16.02	16.93	18.66	16.32
CDCP1-7AAD-	80.21	77.35	77.83	16.89	17.33	16.69	12.32	9.21	9.98
CDCP1+7AAD+	2.27	1.08	2.32	3.57	2.58	4	1.41	4.8	2.88
CDCP1-7AAD+	1.54	3.56	2.58	61.66	62.88	63.29	69.34	67.33	70.82
DK03
	0h			48h			72h
CDCP1+7AAD-	17.73	18.56	17.21	1.68	2.89	2.05	0.23	0.38	0.3
CDCP1-7AAD-	80.49	78.21	79.33	17.96	20.12	21.88	9.65	8.02	8.53
CDCP1+7AAD+	0.56	1.23	2.77	18.21	16.78	15.02	18.79	17.62	19.98
CDCP1-7AAD+	1.22	2	0.69	62.15	60.21	61.05	71.33	73.98	71.19
HK2-10
	0h			48h			72h
CDCP1+7AAD-	9.13	11.32	9.82	10.57	11.02	10.01	8.72	11.93	12.32
CDCP1-7AAD-	88.73	86.72	87.96	26.37	27.31	27.11	10.93	13.21	11.38
CDCP1+7AAD+	0.78	1.12	1.01	1.32	2.08	0.92	1.78	1.25	0.89
CDCP1-7AAD+	1.36	0.84	1.21	61.74	59.59	61.96	78.57	73.61	75.41
HKe3
	0h			48h			72h
CDCP1+7AAD-	13.89	9.97	12.33	3.38	2.09	2.77	0.59	0.78	0.81
CDCP1-7AAD-	83.28	88.63	85.82	33.89	36.23	34.76	17.82	16.1	16.39
CDCP1+7AAD+	1.33	0.89	0.76	3.69	4.38	3.97	5.39	7.11	7.02
CDCP1-7AAD+	1.5	0.51	1.09	59.04	57.3	58.5	76.2	76.01	75.78

## Sheet: Fig 1B
Fig 1B. CDCP1+ cell frequency in CRCs harboring wtKras and mtKras after FOLFOX administration.
CRC108
week0	week2
11.29	60.39
10.97	69.38
12.03	56.73
CRC102
week0	week2
8.39	0.18
9.97	0.27
9.32	0.21

## Sheet: Fig 1C
Fig 1C. Comparison of immunohistochemical CDCP1 staining from fifteen CRC patients before and after neoadjuvant therapy.
patient	pre			post
1	0.3	0.3	0.7	1.8	2.2	2.1
2	1.3	0.6	1.2	3.2	3.1	2.5
3	0.6	1.3	0.6	0.3	0.3	0.5
4	0.7	0.9	1	0.2	0.2	0.3
5	0.8	0.7	1.1	0.4	0.6	0.6
6	1	1.5	1.2	2.6	4.2	3.4
7	0.1	0.3	0.3	1.4	0.6	1
8	0.1	0.7	0.3	0.1	0.2	0.2
9	0.8	0.7	1	2.6	1.7	2.2
10	2.8	2.9	1.4	2.5	2.3	1.8
11	1.6	1.2	1.5	2.6	3	2.9
12	0.3	0.7	0.6	0.6	0.8	0.4
13	1.1	0.9	1.5	0.6	0.3	0.2
14	2.9	1.3	2.5	1.1	0.8	1.3
15	0.4	1	0.8	0.3	0.5	0.3

## Sheet: Fig 1D
Fig 1D. Differential survival of CDCP1+ and CDCP1- subpopulation in CRC108 after treatment with 5-FU.
Day0 (control)
	CDCP1+ cells			CDCP1- cells
CDCP1+7AAD-	99.81	99.9	99.83	0	0	0
CDCP1-7AAD-	0	0	0	99.9	99.9	99.72
CDCP1+7AAD+	0.19	0.1	0.17	0	0	0
CDCP1-7AAD+	0	0	0	0.1	0.1	0.28
Day7 (control)
	CDCP1+ cells			CDCP1- cells
CDCP1+7AAD-	83.63	77.21	79.36	0	0	0
CDCP1-7AAD-	12.1	13.38	13.67	86.32	95.13	83.58
CDCP1+7AAD+	3.06	3.78	4.56	0	0	0
CDCP1-7AAD+	1.21	5.63	2.41	13.68	4.87	16.42
Day7 (5-FU)
	CDCP1+ cells			CDCP1- cells
CDCP1+7AAD-	73.68	80.25	77.18	0	0	0
CDCP1-7AAD-	3.8	5.89	5.52	2.68	3.16	3.5
CDCP1+7AAD+	3.9	2.73	2.6	0	0	0
CDCP1-7AAD+	18.62	11.13	14.7	97.32	96.84	96.5

## Sheet: Fig 1E
Fig 1E. Lung recurrence-free survival of muKras CRC patients based on the scores of CDCP1 IHC staining.
Months	CDCP1 high	CDCP1 low
9	1
60	0
60	0
18	1
21	1
52	1
60	0
60	0
60	0
60	0
60	0
21	1
21	1
60	0
23	1
35	1
26	1
32	1
35	1
60	0
60	0
60	0
21	1
20	1
11	1
42	1
35	1
60	0
60	0
21	1
60	0
16	1
21	1
21	1
60	0
60	0
60	0
60	0
60	0
60	0
60	0
22	1
56	1
60	0
60	0
60	0
33	1
60	0
60	0
60	0
32		1
37		1
60		0
60		0
60		0
60		0
60		0
60		0
60		0
60		0
23		1
33		1
29		1
60		0
60		0
60		0
60		0
21		1
25		1
60		0
60		0
60		0
60		0
60		0
60		0
60		0
60		0
60		0
60		0
27		1
60		0
60		0
60		0
21		1
60		0
60		0
35		1
60		0
60		0
60		0
60		0
60		0
60		0

## Sheet: Fig 1F
Fig 1F. Overall survival of muKras CRC patients based on the scores of CDCP1 IHC staining.
Months	CDCP1 high	CDCP1 low
16	1
60	0
60	0
18	1
25	1
60	0
60	0
60	0
60	0
60	0
60	0
29	1
32	1
60	0
32	1
38	1
30	1
35	1
35	1
60	0
60	0
60	0
30	1
20	1
19	1
60	0
44	1
60	0
60	0
23	1
60	0
18	1
22	1
47	1
60	0
60	0
60	0
60	0
60	0
60	0
60	0
22	1
60	1
60	0
60	0
60	0
33	1
60	0
60	0
60	0
58		1
60		0
60		0
60		0
60		0
60		0
60		0
60		0
60		0
60		0
30		1
56		1
49		1
60		0
60		0
60		0
60		0
50		1
25		1
60		0
60		0
60		0
60		0
60		0
60		0
60		0
60		0
60		0
60		0
47		1
60		0
60		0
60		0
43		1
60		0
60		0
48		1
60		0
60		0
60		0
60		0
60		0
60		0

## Sheet: Fig 1G
Fig 1G. CDCP1 expression in primary muKras CRCs prior to treatment vs. RCB
Class 0 and I	Class II	Class III
0.956597	1.77612	4.10991
0.976277	1.15085	4.54981
1.13185	1.6051	4.03399
1.35925	1.59889	4.88047
1.10558	1.70892	4.0623
0.335325	1.81773	4.38954
0.801511	1.78415	3.87352
0.867934	1.87848	4.8875
1.1065	1.75441	5.6108
1.08495	1.74371	4.49927
1.05302	1.40272	4.42204
0.896721	1.51414	4.30612
0.946116	1.39713	4.23051
1.1523	1.80506
0.919835	1.49212
1.09723	1.50829
1.209	1.79444
	1.82927
	1.51449
	1.02362
	1.35022
	1.73471

## Sheet: Fig 2B
Fig2B.The frequency of tdTomato+ cells also positive for CDCP1 post tamoxifen injection.
Day 0	Day 2	Day 5	Day 10	Day 14	Day 21	Day 28	Day 32	Day 40	Day 50	Day 60	Day 70	Day 80	Day 90
85.3	78.78	75.26	80.21	85.19	80.26	75.13	86.23	84.52	81.77	76.56	84.01	85.88	83.08
81.67	83.64	81.25	73.37	76.88	85.35	80.88	80.63	70.76	77.26	82.23	79.33	74.23	77.59
82.26	82.05	82	78.53	78.21	73.93	88.49	79.09	82.55	85.47	79.71	73.58	84.39	85.39

## Sheet: Fig 2C
Fig 2C. Quantification of tdTomato labeling of tumor cells following tamoxifen injection.
Day 0	Day 2	Day 4	Day 6	Day 8	Day 10	Day 12	Day 14	Day 18	Day 28	Day 38	Day 42	Day 52	Day 62	Day 72	Day 82	Days 90
12.16	10.76	10.68	17.23	23.31	39.33	54.68	67.27	74.33	77.12	73.21	84.33	83.66	93.56	96.88	88.23	96.13
10.21	11.28	13.67	21.35	20.66	35.32	62.82	72.05	65.56	73.85	81.89	78.67	91.96	94.77	88.23	96.35	97.72
10.55	9.78	11.73	15.88	17.73	33.78	59.7	64.98	70.08	71.62	78.58	86.78	89.12	85.18	93.97	97.51	87.87

## Sheet: Fig 2F
Fig 2F. Quantification of CDCP1+CidU+ cell labeled with IdU in CRC101 exnograft after FOLFOX administration.
vehicle	FOLFOX
3.89	49.21
3.7	58.86
2.91	50.88

[truncated: 33 more sheets: Fig 2G, Fig 2H, Fig 2J, Fig 3A, Fig 3B, Fig 3C, Fig 3D, Fig 3E, Fig 3F, Fig 4C, Fig 4E, Fig 4G, Fig 5A, Fig 5B, Fig 5C, Fig 5D, Fig 5E, Fig 7C, Fig S1A, Fig S1B …]
